# Supplementary material
Source: Springer Nature journal article supplement (https://www.springermedizin.de/resource/supplementary/12891_2010_1167_MOESM1_ESM.pdf/9507242)

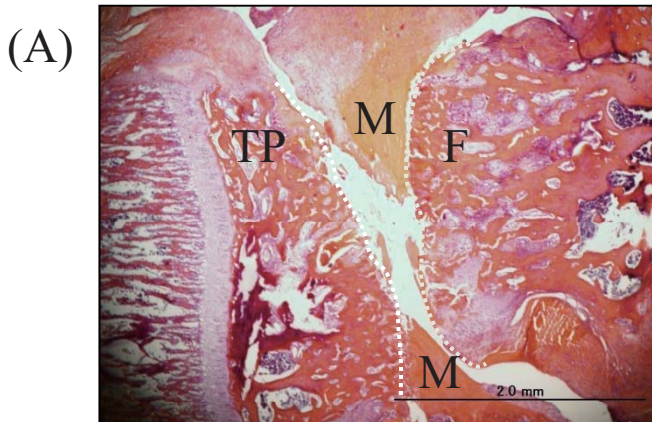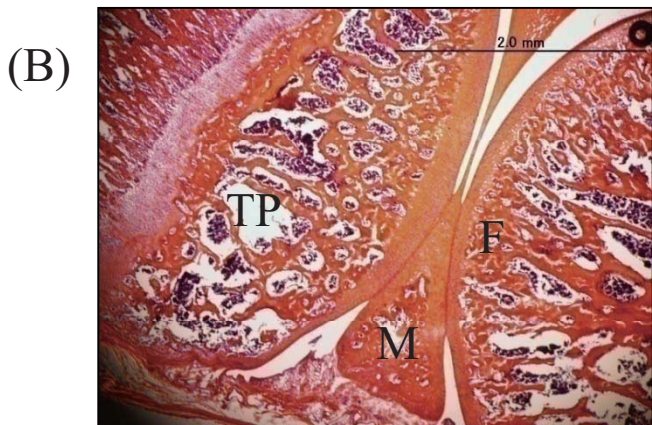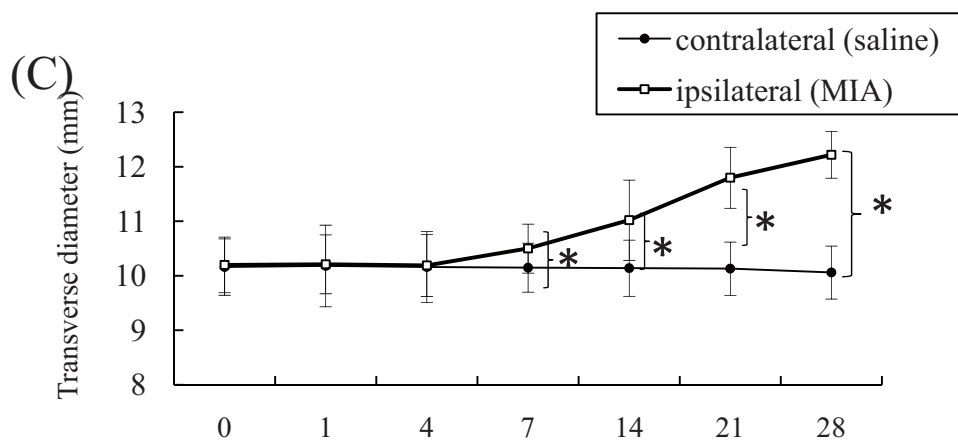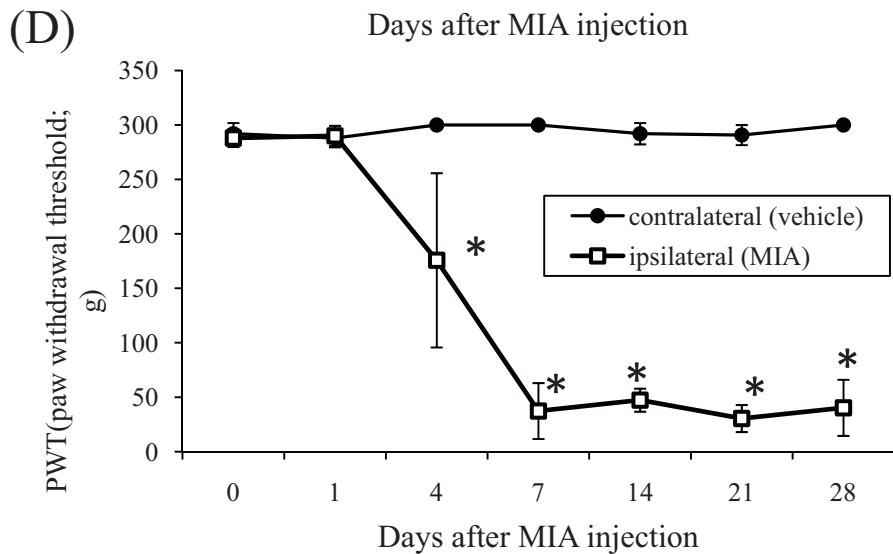

\*:  $P < 0.01$  (vs contralateral)

Supplement: MOESM1 [file 9507242]
